# Supplementary material
Source: Springer Nature journal article supplement (https://www.springermedizin.de/resource/supplementary/12889_2013_6260_MOESM1_ESM.pdf/9498816)
Supplement: MOESM1 [file 9498816]

Box 1: The unit costs of analyzed items [26-35]

| <i>Items</i>                                    | <i>Unit costs<br/>(€)</i> | <i>Reimbursement<br/>basis of the FHI<br/>(general cases)</i> | <i>Unit cost<br/>paid by the<br/>FHI (€)</i> | <i>Reference<br/>source</i>                  | <i>Comments</i>                                                                                                                               |
|-------------------------------------------------|---------------------------|---------------------------------------------------------------|----------------------------------------------|----------------------------------------------|-----------------------------------------------------------------------------------------------------------------------------------------------|
| <b>Initial consultation</b>                     |                           |                                                               |                                              |                                              |                                                                                                                                               |
| <b>by GP</b>                                    |                           |                                                               |                                              |                                              |                                                                                                                                               |
| <2 yo                                           | 28.00                     | 70%                                                           | 19.60                                        | <i>Assurance<br/>Maladie –<br/>NGAP [26]</i> | Considering the family<br>doctor of the patient<br>attending at his office [sector<br>1]                                                      |
| 2-6 yo                                          | 26.00                     | 70%                                                           | 18.20                                        |                                              |                                                                                                                                               |
| 6-18 yo                                         | 23.00                     | 70%                                                           | 16.10                                        |                                              |                                                                                                                                               |
| >18 yo                                          | 23.00                     | [23.00€ * 70%=<br>16.10€ – 1.00€]                             | 15.10                                        |                                              |                                                                                                                                               |
| <b>Initial consultation by<br/>PEDIATRICIAN</b> |                           |                                                               |                                              |                                              |                                                                                                                                               |
| <2 yo                                           | 31.00                     | 70% and 100%<br>[26.00€ * 70%+<br>5.00€ * 100%]               | 23.20                                        | <i>Assurance<br/>Maladie [26]</i>            | Considering a physician<br>attending at his office [sector<br>1]<br>Children under 2 yo have<br>pediatric child fees of 5€<br>100% reimbursed |
| 2-6 yo                                          | 31.00                     | 70%                                                           | 21.70                                        |                                              |                                                                                                                                               |
| 6-16 yo                                         | 28.00                     | 70%                                                           | 19.60                                        |                                              |                                                                                                                                               |
| <b>Vaccine</b>                                  |                           |                                                               |                                              |                                              |                                                                                                                                               |
| ≥65 yo or<br>risk morbidity                     | 6.25                      | 100%                                                          | 6.25                                         | <i>Vidal [30]<br/>Thériaque<br/>[31]</i>     | Cost of the vaccine, but not<br>the cost of administration<br>(due to the complexity of<br>measurement)                                       |
| others                                          | 6.25                      | 0%                                                            | 0                                            |                                              |                                                                                                                                               |
| <b>Follow-up<br/>consultation</b>               |                           |                                                               |                                              |                                              |                                                                                                                                               |
| <2 yo                                           | 28.00                     | 70%                                                           | 19.60                                        | <i>Assurance<br/>Maladie [26]</i>            | Considering the family GP<br>attending at sector 1<br>Patients over 18 yo have a fee<br>of 1€                                                 |
| 2-6 yo                                          | 26.00                     | 70%                                                           | 18.20                                        |                                              |                                                                                                                                               |
| 6-18 yo                                         | 23.00                     | 70%                                                           | 16.10                                        |                                              |                                                                                                                                               |
| >18 yo                                          | 23.00                     | [23.00€ * 70%=<br>16.10€ – 1.00€]                             | 15.10                                        |                                              |                                                                                                                                               |
| <b>Telephone<br/>consultation</b>               |                           |                                                               |                                              |                                              |                                                                                                                                               |
|                                                 | -                         | 0                                                             | 0.00                                         | <i>Assurance<br/>Maladie [26]</i>            | Phone consultations are not<br>charged                                                                                                        |

| <i>Items</i>              | <i>Unit costs<br/>(€)</i> | <i>Reimbursement<br/>basis of the FHI<br/>(general cases)</i> | <i>Unit cost<br/>paid by the<br/>FHI (€)</i> | <i>Reference<br/>source</i>                                                | <i>Comments</i>                                                                                        |
|---------------------------|---------------------------|---------------------------------------------------------------|----------------------------------------------|----------------------------------------------------------------------------|--------------------------------------------------------------------------------------------------------|
| <b>Home visit</b>         |                           |                                                               |                                              |                                                                            |                                                                                                        |
| <2 yo                     | 38.00                     | 70%                                                           | 26.60                                        |                                                                            | visit [23€] + shifting [10€] + MNO [5€]                                                                |
| 2-6 yo                    | 36.00                     | 70%                                                           | 25.20                                        | <i>Assurance<br/>Maladie</i> [26]                                          | visit [23€] + shifting [10€] + MGE [3€]                                                                |
| 6-18 yo                   | 33.00                     | 70%                                                           | 23.10                                        |                                                                            | visit [23€] + shifting [10€]                                                                           |
|                           |                           | 70%                                                           |                                              |                                                                            | visit [23€] + shifting [10€] -                                                                         |
| >18 yo                    | 33.00                     | [33.00€ * 70% =<br>23.10€ - 1.00€]                            | 22.10                                        |                                                                            | 1€ of consultation fees charged                                                                        |
| <b>Emergency services</b> |                           |                                                               |                                              |                                                                            |                                                                                                        |
| <b>general costs</b>      |                           |                                                               |                                              |                                                                            |                                                                                                        |
|                           | 25.28                     | 80%                                                           | 20.22                                        |                                                                            | Package for attending non expected patients at a medical institution without following hospitalization |
| <2 yo                     | 28.00+                    | 70%                                                           | 39.82                                        | <i>Ministère de<br/>la Santé</i> [27]                                      | [ATU at MCOO]                                                                                          |
| consult + ER              | 25.28                     | 80%                                                           |                                              |                                                                            |                                                                                                        |
| 2-6 yo                    | 26.00+                    | 70%                                                           | 38.42                                        |                                                                            | Considering usual consultations fees                                                                   |
| consult + ER              | 25.28                     | 80%                                                           |                                              |                                                                            |                                                                                                        |
| 6-18 yo                   | 23.00+                    | 70%                                                           | 36.32                                        |                                                                            |                                                                                                        |
| consult + ER              | 25.28                     | 80%                                                           |                                              |                                                                            |                                                                                                        |
| >18 yo                    | 23.00+                    | 70% - 1.00€                                                   | 35.32                                        |                                                                            |                                                                                                        |
| consult + ER              | 25.28                     | 80%                                                           |                                              |                                                                            |                                                                                                        |
| <b>Hospitalization</b>    |                           |                                                               |                                              |                                                                            |                                                                                                        |
|                           | 2248.16                   | 80%<br>[independent of<br>number of days]                     | 1798.53                                      | <i>Assurance<br/>Maladie</i> [28]<br><i>Ministère de<br/>la Santé</i> [29] | Package for treating respiratory signs and symptoms without other morbidities [GHS 1116, GHM 04M11V]   |

| <i>Items</i>                                                | <i>Unit costs<br/>(€)</i>                                                                                     | <i>Reimbursement<br/>basis of the FHI<br/>(general cases)</i> | <i>Unit cost<br/>paid by the<br/>FHI (€)</i> | <i>Reference<br/>source</i>                            | <i>Comments</i>                                                                                          |
|-------------------------------------------------------------|---------------------------------------------------------------------------------------------------------------|---------------------------------------------------------------|----------------------------------------------|--------------------------------------------------------|----------------------------------------------------------------------------------------------------------|
| <b>Drugs</b>                                                | <i>Only reimbursed drugs were considered: reimbursement rate is applied for the cheapest ICD by age group</i> |                                                               |                                              |                                                        |                                                                                                          |
| <b>ANTIBIOTICS</b>                                          |                                                                                                               |                                                               |                                              |                                                        |                                                                                                          |
| [example of<br><b>amoxiciline</b> ]                         |                                                                                                               |                                                               |                                              | <i>GROG [21]<br/>Vidal [30]<br/>Thériaque<br/>[31]</i> | -                                                                                                        |
| <3 yo                                                       | 1.60                                                                                                          | 65%                                                           | 1.04                                         |                                                        |                                                                                                          |
| 3-6 yo                                                      | 2.00                                                                                                          | 65%                                                           | 1.30                                         |                                                        |                                                                                                          |
| >6 yo                                                       | 2.06                                                                                                          | 65%                                                           | 1.34                                         |                                                        |                                                                                                          |
| <b>ANTIVIRALS</b>                                           |                                                                                                               |                                                               |                                              |                                                        |                                                                                                          |
| [example of<br><b>oseltamivir</b> as curative<br>treatment] |                                                                                                               |                                                               |                                              | <i>GROG [21]<br/>Vidal [30]<br/>Thériaque<br/>[31]</i> | 30% of reimbursement is<br>considered for all patients                                                   |
| <12 yo                                                      | 12.69                                                                                                         | 30%                                                           | 3.81                                         |                                                        |                                                                                                          |
| ≥12 yo                                                      | 24.85                                                                                                         | 30%                                                           | 7.46                                         |                                                        |                                                                                                          |
| <b>OTHERS</b>                                               |                                                                                                               |                                                               |                                              |                                                        |                                                                                                          |
| [example of<br><b>paracetamol</b> ]                         |                                                                                                               |                                                               |                                              | <i>GROG [21]<br/>Vidal [30]<br/>Thériaque<br/>[31]</i> |                                                                                                          |
| <8 yo                                                       | 1.93                                                                                                          | 65%                                                           | 1.25                                         |                                                        |                                                                                                          |
| ≥8 yo                                                       | 1.47                                                                                                          | 65%                                                           | 0.96                                         |                                                        |                                                                                                          |
| <b>Additional tests</b>                                     |                                                                                                               |                                                               |                                              |                                                        |                                                                                                          |
| Creatine                                                    | 3.24                                                                                                          |                                                               |                                              |                                                        | Code: CPK 1520<br>Subscription: 12B [12*0.27€]                                                           |
| Phosphokinase                                               | + 4.05                                                                                                        | 60%                                                           | 4.37                                         | <i>Assurance<br/>maladie [32]<br/>TNB</i>              | One exam for each patient +<br>blood taken 15B [4.05€]                                                   |
| Cysteine-Rich Protein                                       | 5.40<br>+ 4.05                                                                                                | 60%                                                           | 5.67                                         |                                                        | Code: CRP 1804<br>Subscription: 20B [20*0.27€]<br>One exam for each patient +<br>Blood taken 15B [4.05€] |

| <i>Items</i>                                                  | <i>Unit costs<br/>(€)</i> | <i>Reimbursement<br/>basis of the FHI<br/>(general cases)</i> | <i>Unit cost<br/>paid by the<br/>FHI (€)</i> | <i>Reference<br/>source</i>                      | <i>Comments</i>                                                                                                         |
|---------------------------------------------------------------|---------------------------|---------------------------------------------------------------|----------------------------------------------|--------------------------------------------------|-------------------------------------------------------------------------------------------------------------------------|
| Urine culture                                                 | 18.90                     | 60%                                                           | 11.34                                        |                                                  | Code: ECBU 5201<br>Subscription: 70B<br>[70*0.27€]<br>One exam for each patient                                         |
| Electrocardiogram                                             | 13.52<br>+ 23.00          | 70%                                                           | 25.56                                        |                                                  | Code: DEQP001<br>One exam for each patient +<br>labor costs [23€]                                                       |
| Chest X Ray                                                   | 25.92<br>+ 23.00          | 70%                                                           | 34.24                                        | <i>Assurance<br/>maladie</i> [33]                | Code: ZBQK002<br>One exam for each patient +<br>labor costs [23€]                                                       |
| Cranial X Ray                                                 | 23.94<br>+ 23.00          | 70%                                                           | 32.86                                        | <i>CCAM</i>                                      | Code: LAQK003<br>One exam for each patient +<br>labor costs [23€]                                                       |
| Thorax Scanner<br>[without contrast<br>intravenous injection] | 30.78<br>+ 23.00          | 70%                                                           | 37.65                                        |                                                  | Code: ZBQK001<br>One exam for each patient +<br>labor costs [23€]                                                       |
| <b>Paramedical care</b>                                       |                           |                                                               |                                              |                                                  |                                                                                                                         |
| Respiratory<br>physiotherapy and<br>physiotherapist fees      | 103.20                    | 60%                                                           | 75.72                                        | <i>Assurance<br/>Maladie</i> [26]<br><i>NGAP</i> | Code: AMK 8<br><i>average package of 6<br/>sections</i><br><i>2.15€ x 8 € x 6 sections</i><br>One pack for each patient |
| Nutritionist                                                  | -                         | 0                                                             | 0.00                                         | -                                                | Consultation to nutritionist is<br>not reimbursed                                                                       |
| Osteopathy                                                    | -                         | 0                                                             | 0.00                                         | -                                                | Consultation to osteopath is<br>not reimbursed                                                                          |
| <b>Work absenteeism</b>                                       |                           |                                                               |                                              |                                                  |                                                                                                                         |
|                                                               | -                         | -                                                             | 46.33                                        | <i>Assurance<br/>Maladie</i> [34]<br>INSEE [35]  | Cost per day for patients in<br>remunerated employment<br>Since the 4th day of absence                                  |

Legend: ATU: Reception and treatment of emergencies; CCAM: Classification commune des actes médicaux; FHI: French Health Insurance; GHM: Groupes Homogènes de Malades; GHS: Groupes Homogènes de Séjour; GP: General

Practice[tioner]; GROG: Groupes Régionaux d'Observation de la Grippe; ICD: International Common Denomination; MCCO: activities of medicine, surgery, obstetrics and dentistry; MGE: supplement for children 2-6 years; MNO: supplement for children 0-2 years; NGAP: Nomenclature Générale des Actes Professionnels; sector 1: corresponds to the rate that is the basis for the reimbursement of health insurance; TNB: Table National de Biologie; yo: years old.
